# Supplementary material for: Operational stability enhancement in organic light-emitting diodes with ultrathin Liq interlayers
Source: PubMed Central journal article supplement (PMC4772539; doi:10.1038/srep22463), 2016-03-01
Supplement: srep22463-s1.pdf [file srep22463-s1.pdf]

## Extended Data

# Operational stability enhancement in organic light emitting diodes with ultrathin Liq interlayers

<sup>1</sup>Daniel Ping-Kuen Tsang and <sup>1,2</sup>Chihaya Adachi

<sup>1</sup>Center for Organic Photonics and Electronics Research (OPERA), Kyushu University, 744 Motooka,

Nishi, Fukuoka 819-0395, Japan

<sup>2</sup>JST, ERATO, Adachi Molecular Exciton Engineering Project, Kyushu University, 744 Motooka, Nishi,

Fukuoka 819-0395, Japan

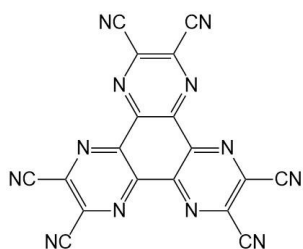

HAT-CN

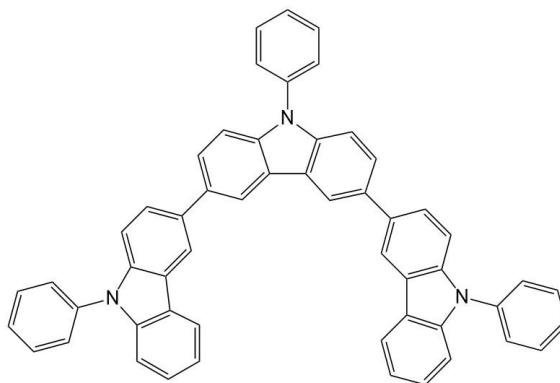

Tris-PCz

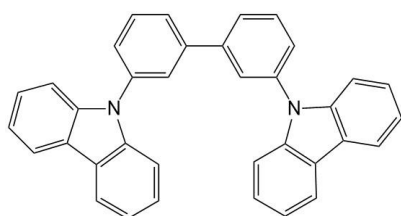

mCBP

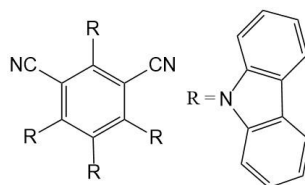

4CzIPN

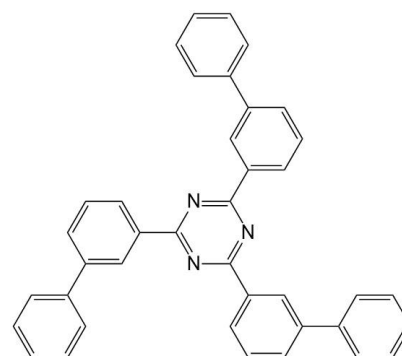

T2T

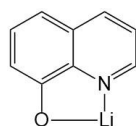

Liq

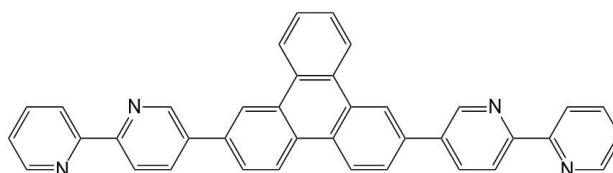

BPy-TP2

Extended Data Figure 1 | Chemical structures of materials in the tested devices.

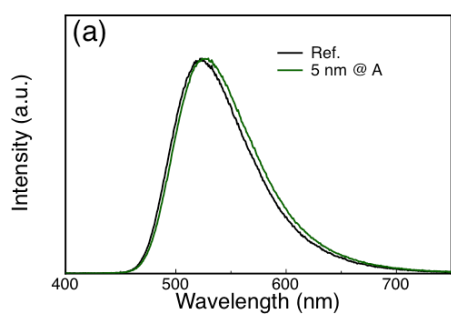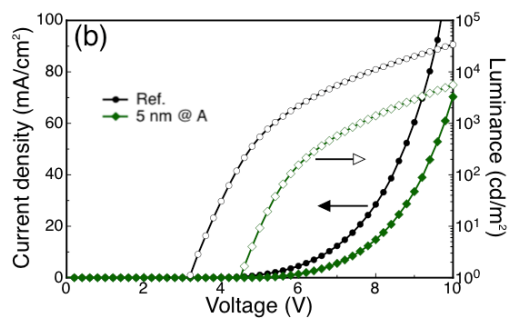

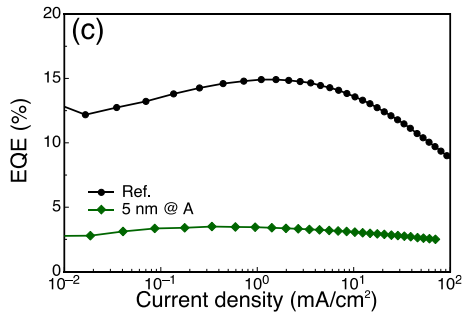

**Extended Data Figure 2 | The electroluminescence characteristics of the reference device (Ref.) and a device with a 5-nm-thick Liq interlayer at position A. a,** Electroluminescence spectra at 10 mA/cm<sup>2</sup>. **b,** Luminance (empty symbols) and current density (filled symbols) as a function of voltage. **c,** External quantum efficiency vs. current density characteristics.

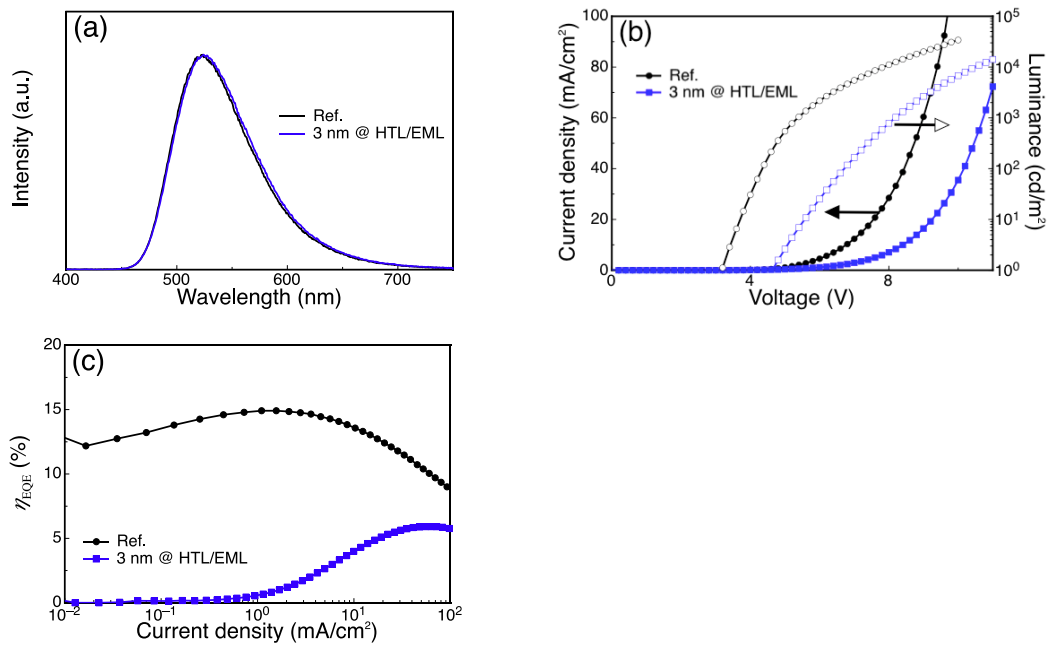

**Extended Data Figure 3 | The electroluminescence characteristics of the reference device (Ref.) and a device with a 3-nm-thick Liq interlayer between the HTL and EML. a,** Electroluminescence spectra at 10 mA/cm<sup>2</sup>. **b,** Luminance (empty symbols) and current density (filled symbols) as a function of voltage. **c,** External quantum efficiency vs. current density characteristics.

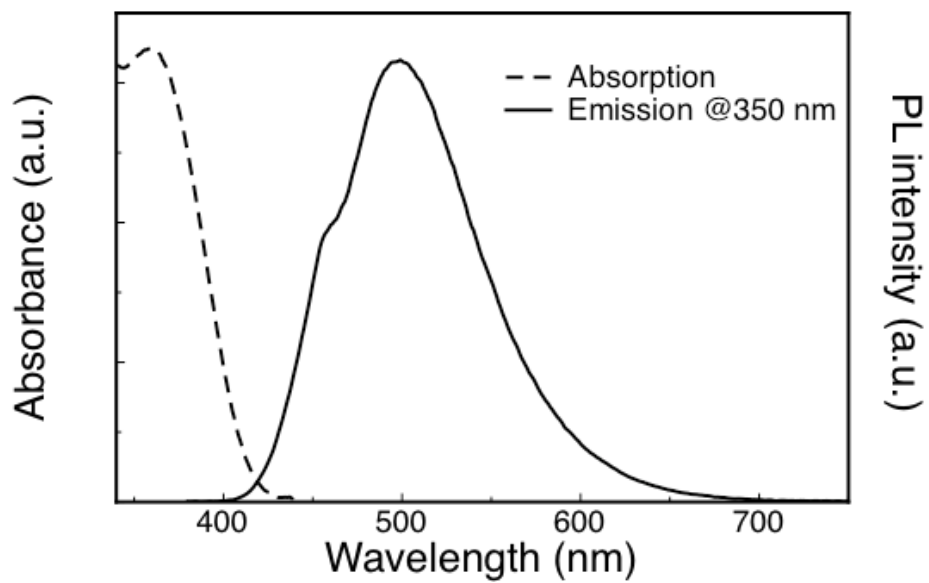

**Extended Data Figure 4 | The absorption and photoluminescence spectra of Liq film excited by a 350 nm light source.**

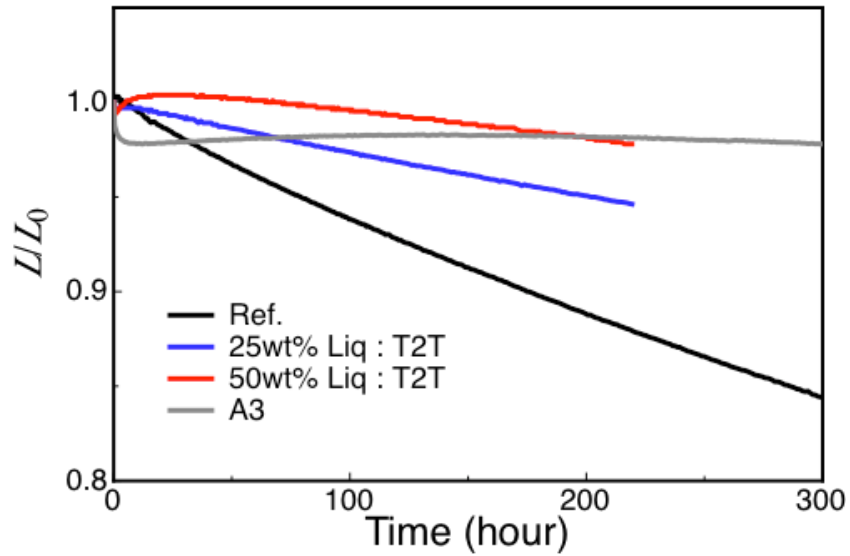

**Extended Data Figure 5 | Luminance vs. operating time at a fixed current density with an initial luminescence of 1,000 cd/m<sup>2</sup> for the reference device (Ref.) and devices with an HBL doped with Liq.** The structure of the devices with the doped HBML was ITO / HAT-CN (10 nm) / Tris-PCz (30 nm) / 15 wt% 4CzIPN:mCBP (30 nm) / 25wt% Liq:T2T (blue) or 50wt% Liq:HBL (red) / Bpy-TP2 (40 nm) / LiF (0.8 nm) / Al (100 nm).

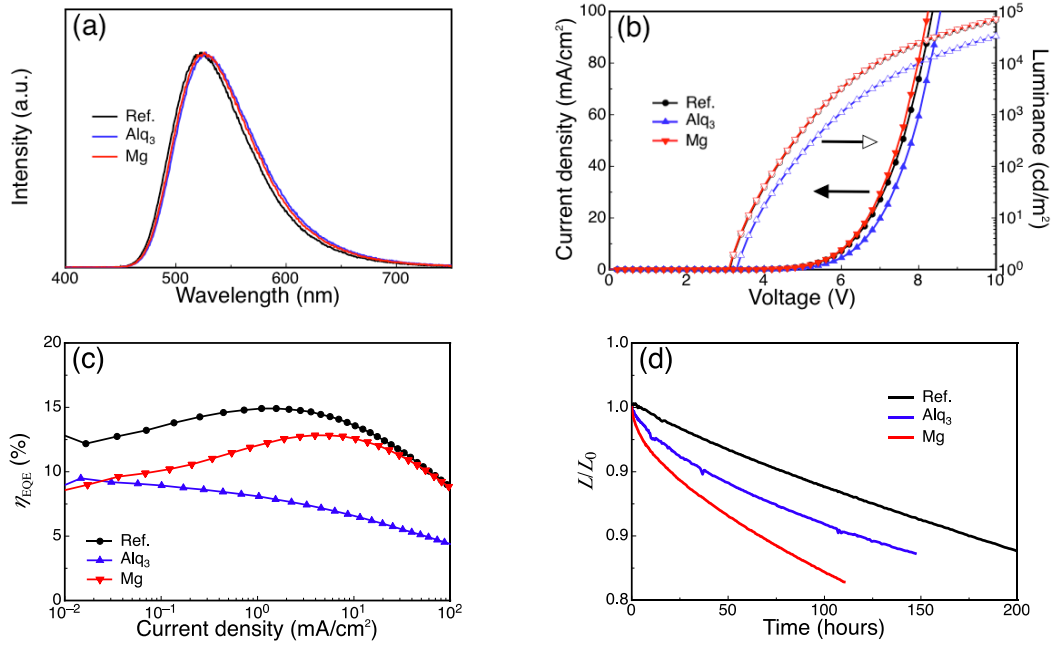

**Extended Data Figure 6 | The electroluminescence characteristics of a reference device (Ref.) and devices with a 3-nm-thick interlayer of either 3 nm Alq<sub>3</sub> or Mg at position A. a,** Electroluminescence spectra at 10 mA/cm<sup>2</sup>. **b,** Luminance (empty symbols) and current density (filled symbols) as a function of voltage. **c,** External quantum efficiency vs. current density characteristics. **d,** Luminance vs. operating time at a fixed current density with an initial luminance of 1,000 cd/m<sup>2</sup>.

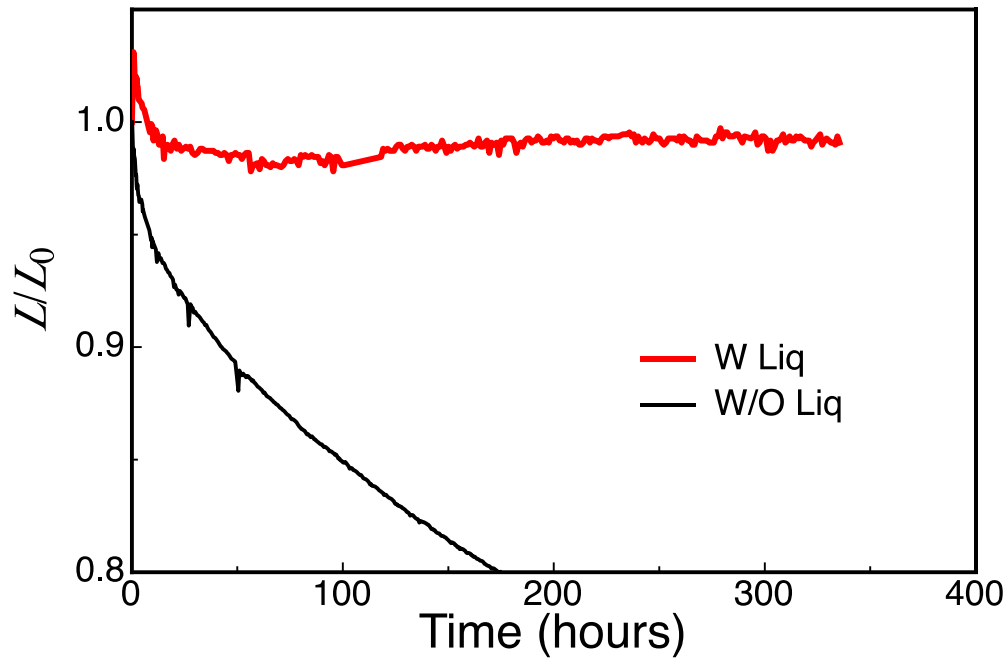

**Extended Data Figure 7 | Luminance vs. operating time at a fixed current density with an initial luminescence of 1,000 cd/m<sup>2</sup> for phosphorescent OLEDs with and without Liq.** The device structure is ITO / HAT-CN (10 nm) / Tris-PCz (30 nm) / 8 wt% Ir(ppy)<sub>3</sub>:mCBP (30 nm) / (red curve only) Liq (3 nm) / T2T (10 nm) / Bpy-TP2 (40 nm) / LiF (0.8 nm) / Al (100 nm).
